# Supplementary material for: Ultrafast synthesis of cation/anion co-doped Li-rich layered oxide cathodes with Li+/Ni2+ mixing structural defects
Source: Royal Society of Chemistry journal article supplement (doi:10.1039/d3ta07880a), 2024-01-01
Supplement: d3ta07880a3.pdf [file d3ta07880a3.pdf]

**Table S4.** Comparison of voltage decay of the reported LLOs.

| Modified strategy                                                | Cycle number (n) | Voltage decay (mV / cycle) | Reference |
|------------------------------------------------------------------|------------------|----------------------------|-----------|
| KP-LLO                                                           | 500              | 1.1                        | This work |
| Spinel coating                                                   | 50               | 4.4                        | 9         |
| LiMgPO <sub>4</sub> coating                                      | 250              | 1.6                        | 10        |
| Li <sub>4</sub> M <sub>5</sub> O <sub>12</sub> @LBO dual coating | 100              | 4.8                        | 11        |
| La <sup>3+</sup> doping                                          | 100              | 1.5                        | 12        |
| CoF <sub>2</sub> coating                                         | 100              | 3.1                        | 13        |
| LiCoPO <sub>4</sub> and spinel dual coating                      | 100              | 4.0                        | 14        |
| Nb <sup>5+</sup> surface doping                                  | 100              | 1.4                        | 15        |
| Li <sub>4</sub> Mn <sub>5</sub> O <sub>12</sub> coating          | 300              | 1.8                        | 16        |
| La doping and CaF <sub>2</sub> coating                           | 100              | 2.0                        | 17        |
| LiCeO <sub>2</sub> coating                                       | 200              | 2.0                        | 18        |
| LiTaO <sub>3</sub> coating                                       | 50               | 2.2                        | 19        |
| K <sub>1-x</sub> Li <sub>x</sub> F coating and K surface doping  | 100              | 3.1                        | 20        |
| CeO <sub>2</sub> @Rocksalt surface modification                  | 200              | 1.8                        | 21        |
| PDA coating                                                      | 200              | 1.5                        | 22        |
| Single-crystal LLO                                               | 50               | 2.5                        | 23        |

---

|                                                                                                                |     |      |    |
|----------------------------------------------------------------------------------------------------------------|-----|------|----|
| Ti <sup>4+</sup> doping                                                                                        | 130 | 3.3  | 24 |
| Li <sub>3</sub> PO <sub>4</sub> and spine dual coating                                                         | 100 | 5.5  | 25 |
| Li <sub>0.5</sub> Mn <sub>0.5</sub> O coating                                                                  | 200 | 2.3  | 26 |
| LiF-MgF <sub>2</sub> -CaF <sub>2</sub> coating and Mg <sup>2+</sup> , Ca <sup>2+</sup> , F <sup>-</sup> doping | 120 | 3.1  | 27 |
| Li <sub>2</sub> TiO <sub>3</sub> coating                                                                       | 125 | 1.3  | 28 |
| Surface Al-doping                                                                                              | 100 | 3.1  | 29 |
| Surficial oxygen vacancies                                                                                     | 200 | 1.5  | 30 |
| Li <sub>3</sub> PO <sub>4</sub> and spinel dual coating                                                        | 300 | 0.8  | 31 |
| F <sup>-</sup> gradient doping and LiF coating                                                                 | 100 | 1.75 | 32 |

---
